# Supplementary material for: Disentangling the riddle of systemic lupus erythematosus with antiphospholipid syndrome: blood transcriptome analysis reveals a less-pronounced IFN-signature and distinct molecular profiles in venous versus arterial events
Source: PubMed Central journal article supplement — Ann Rheum Dis. 2024 Apr 12;83(9):1132–43. doi: 10.1136/ard-2024-225664 (PMC11420729; doi:10.1136/ard-2024-225664), 2024-04-12
Supplement: ard-2024-225664supp001.pdf [file ard-2024-225664supp001.pdf]

A

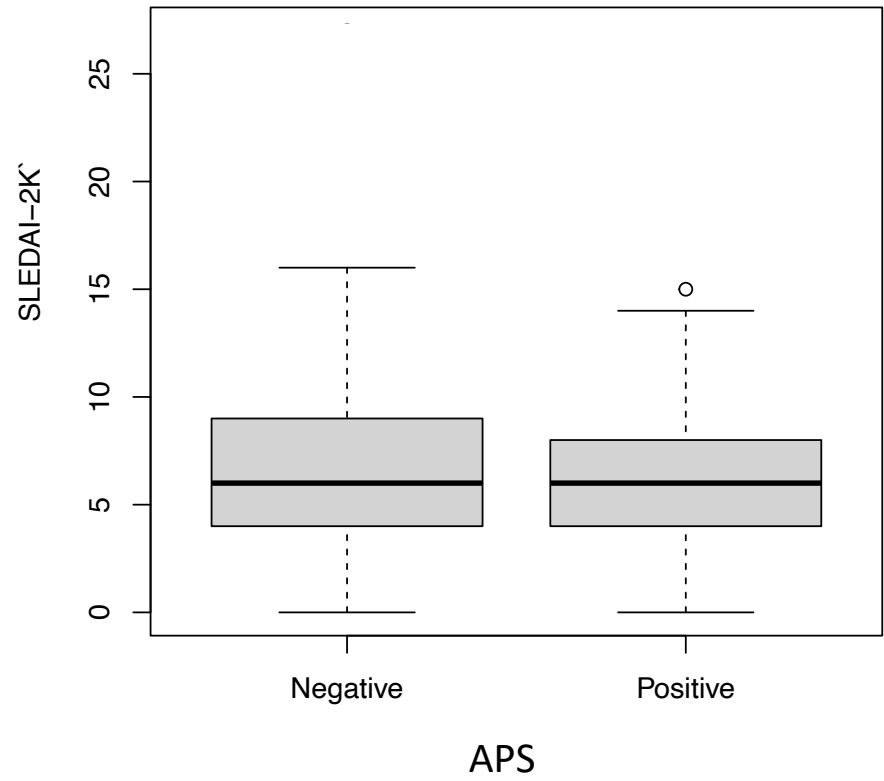

B

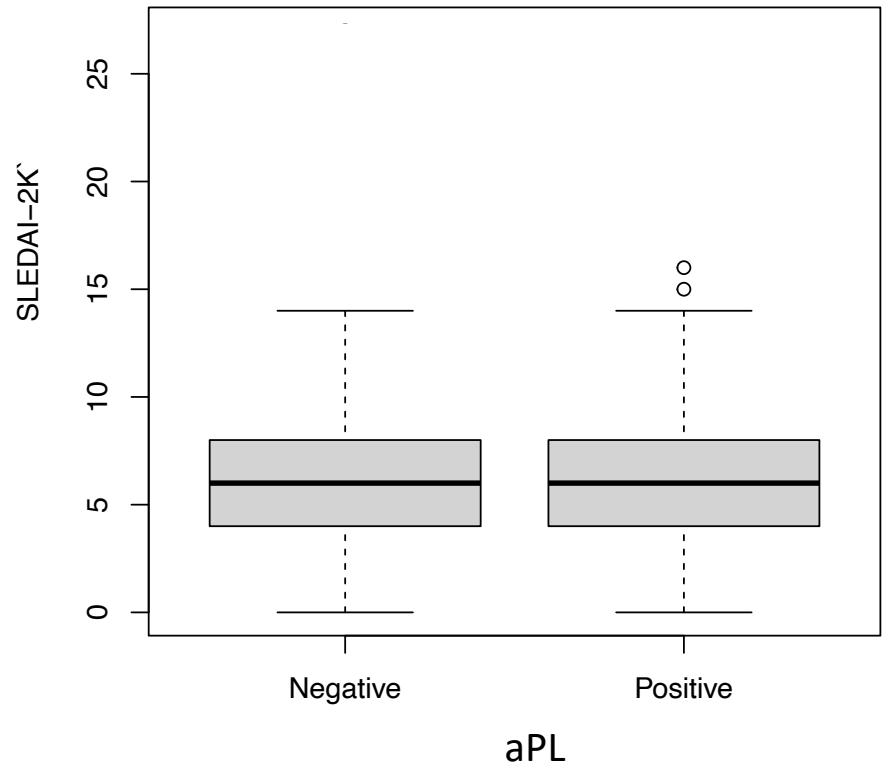

SFigure 1

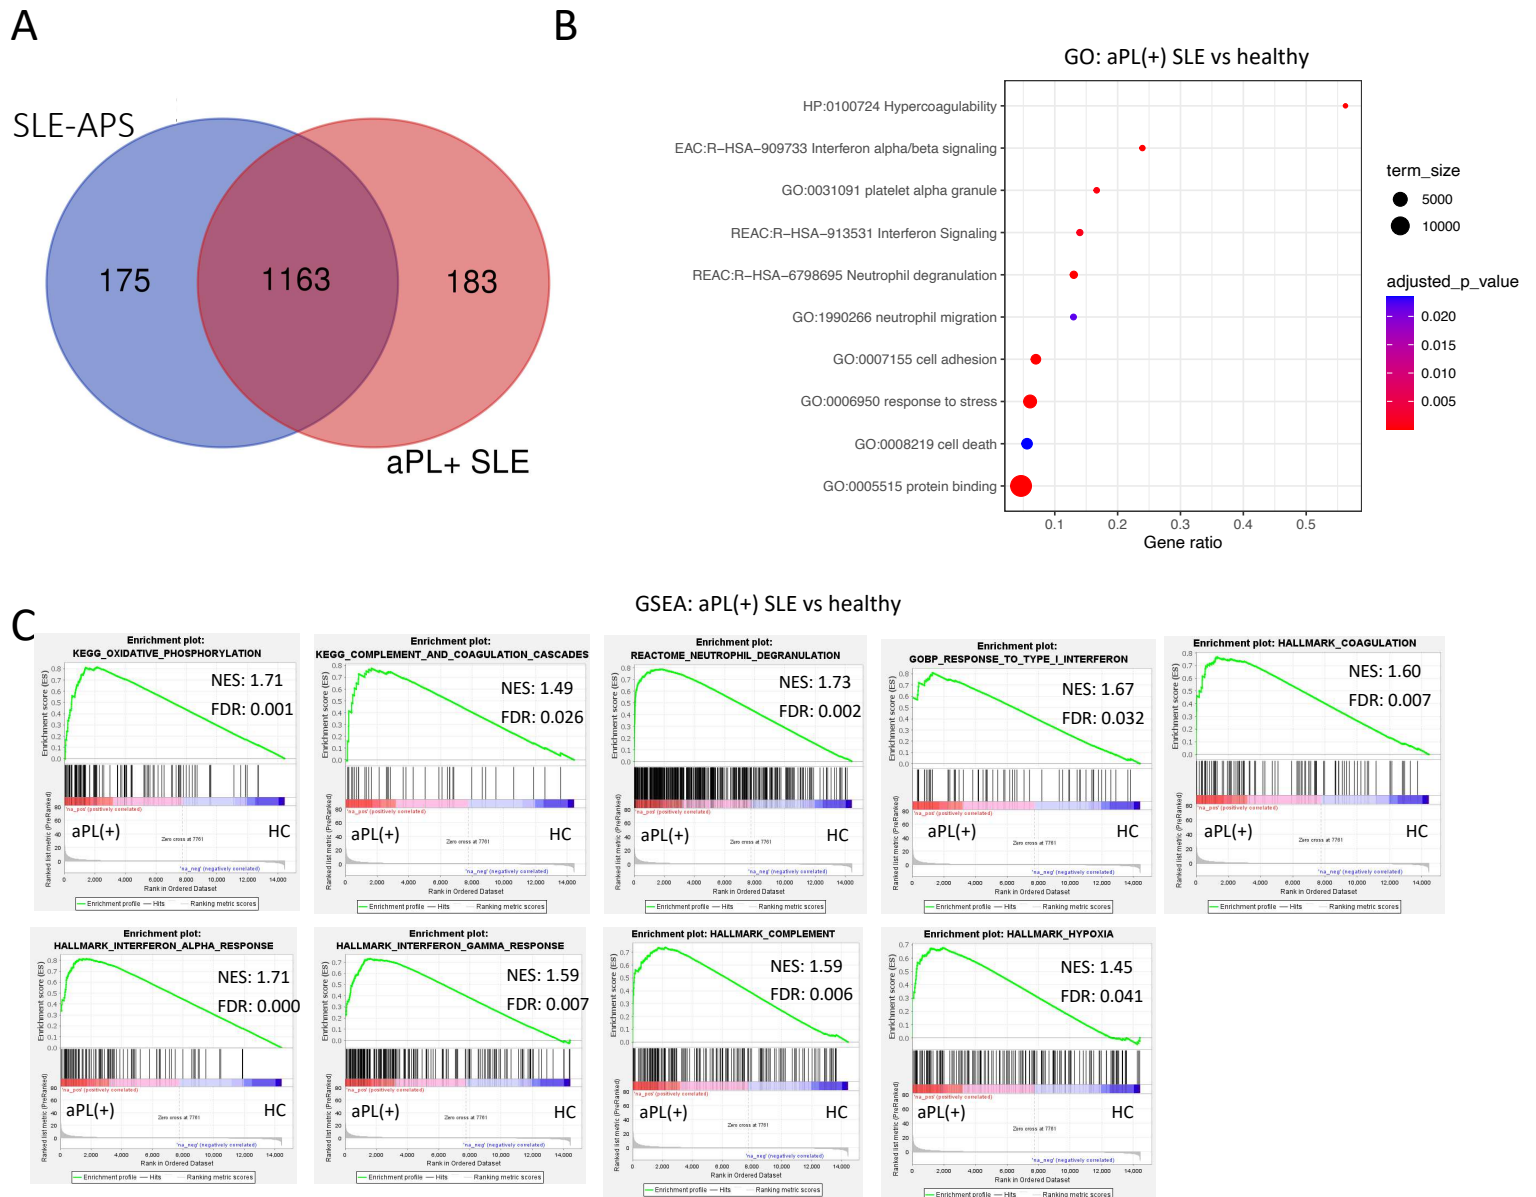

Sfigure 2

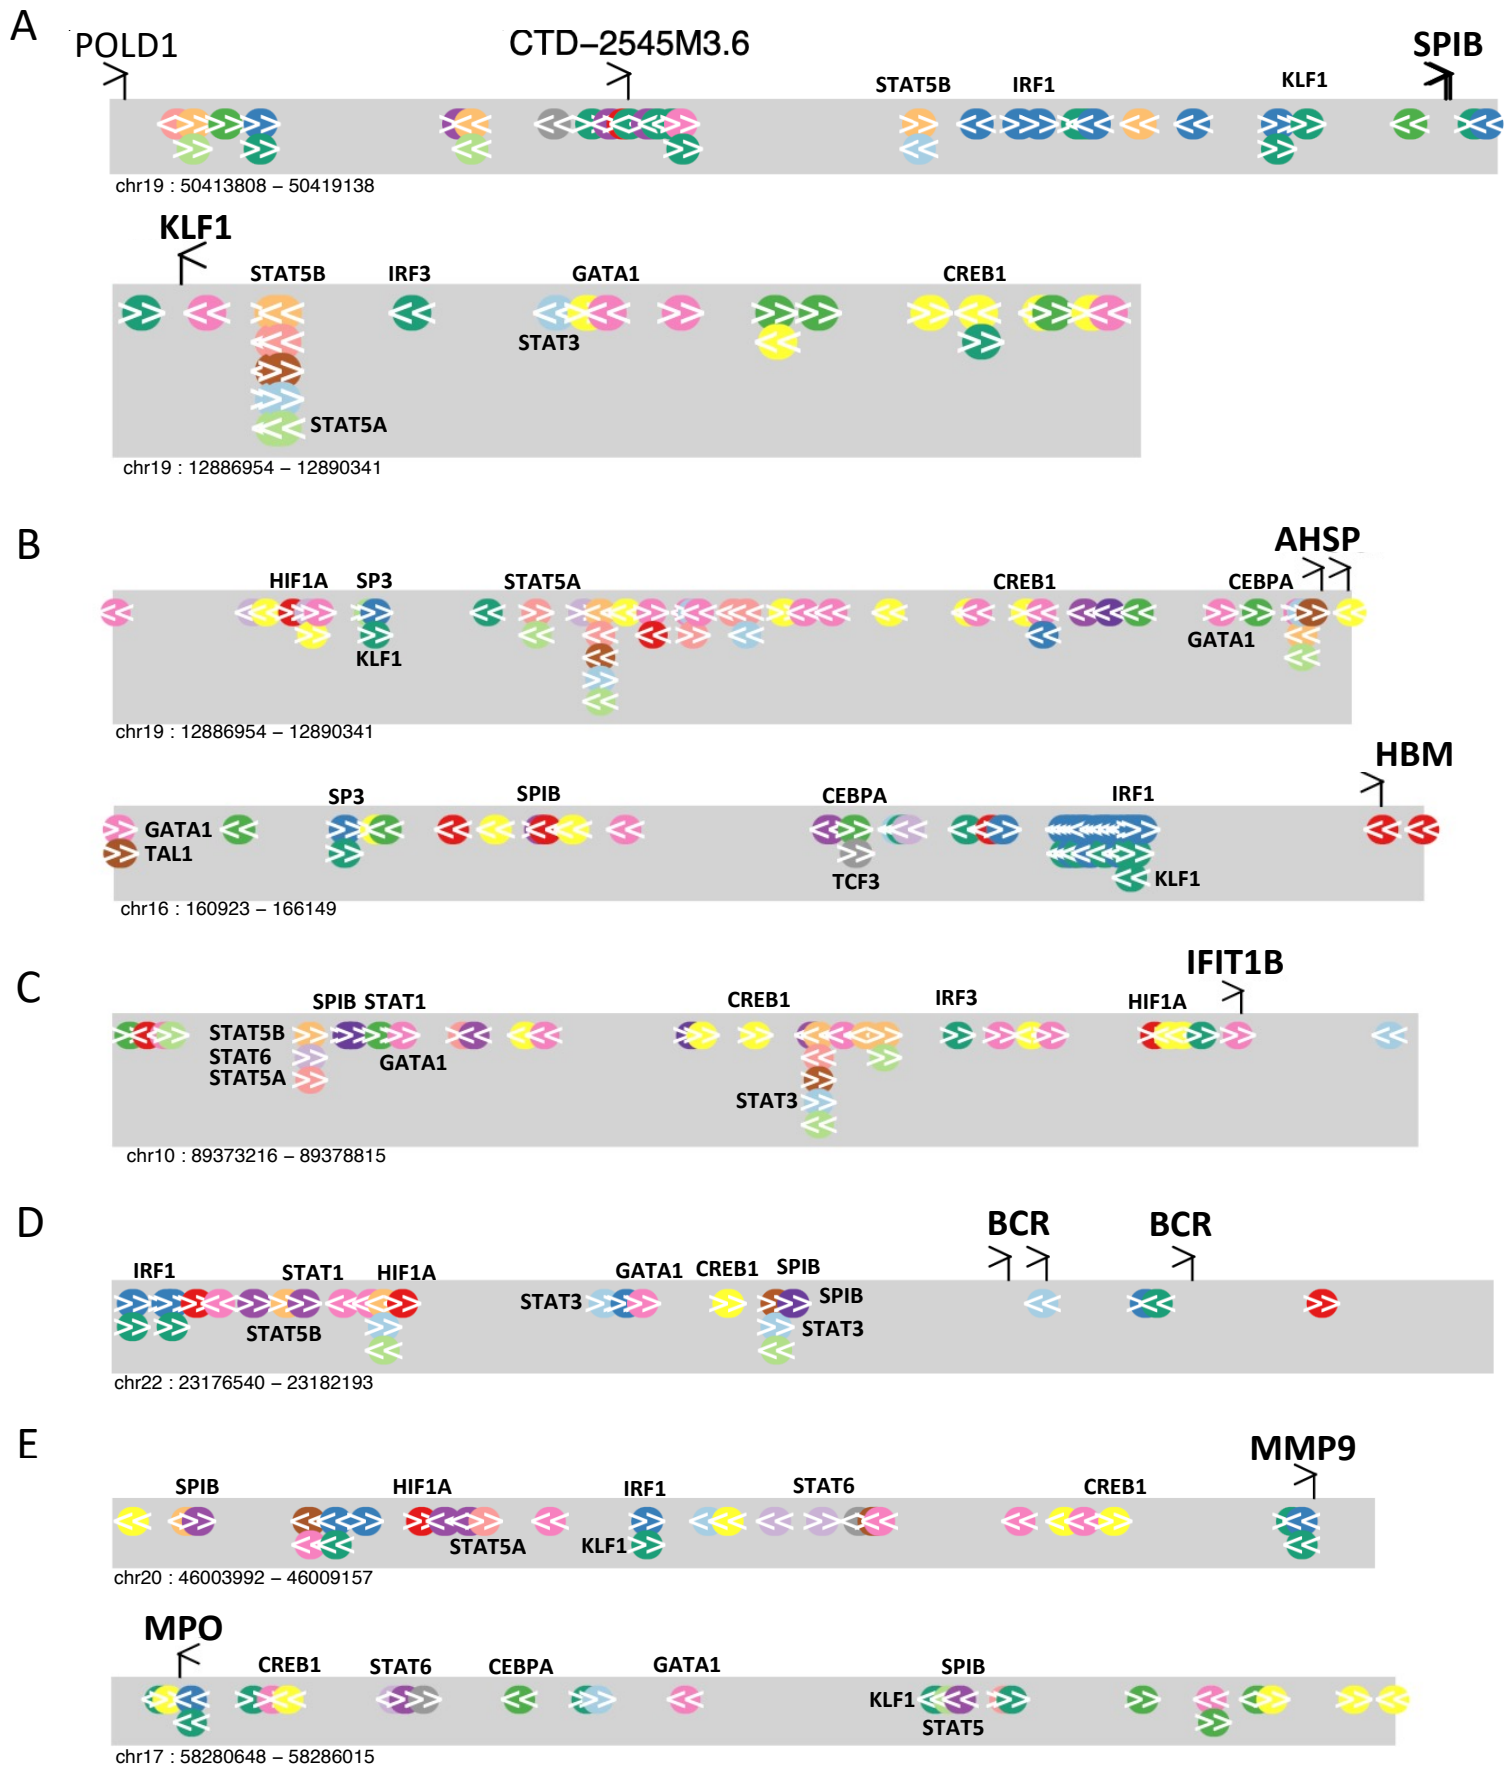

SFigure 3

A

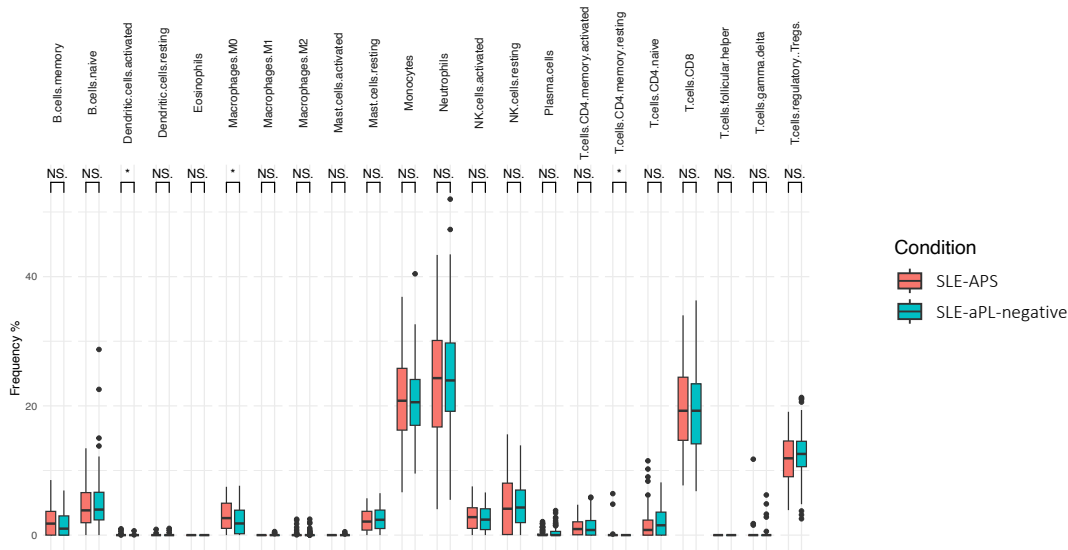

B

GO: aPL(+) vs aPL(-) SLE patients

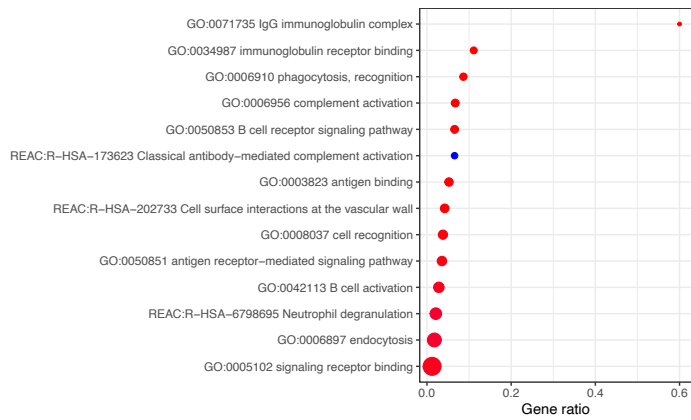

C

GSEA: aPL(+) vs aPL(-) SLE patients

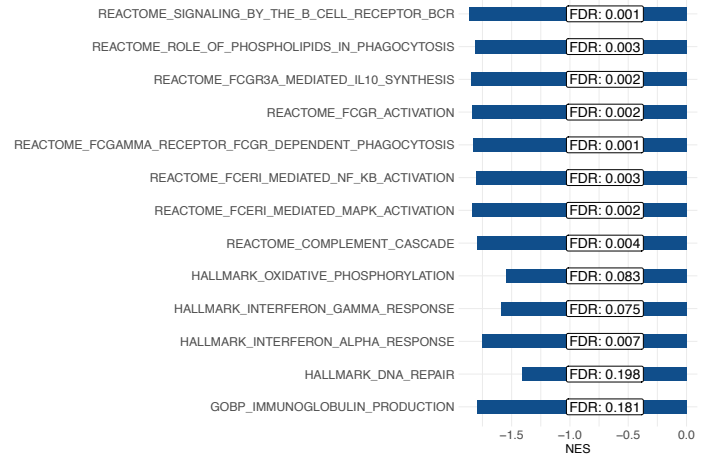

Sfigure 4

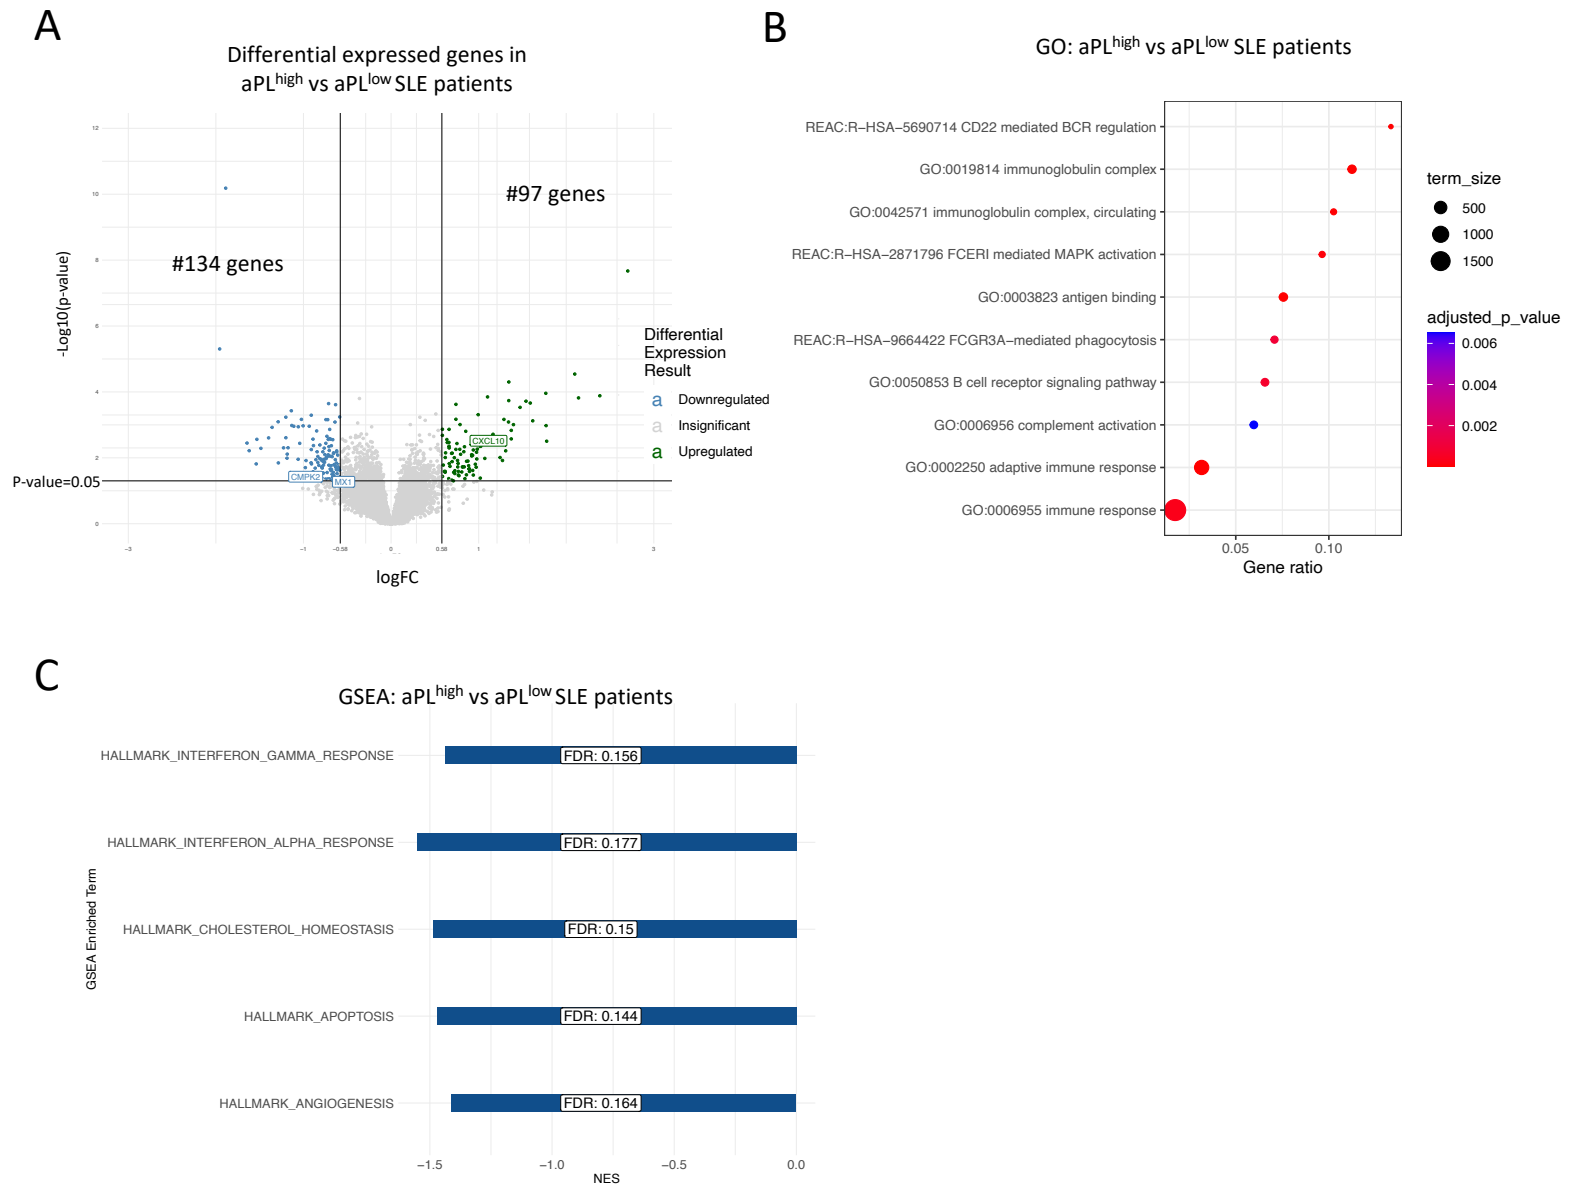

SFigure 5

A

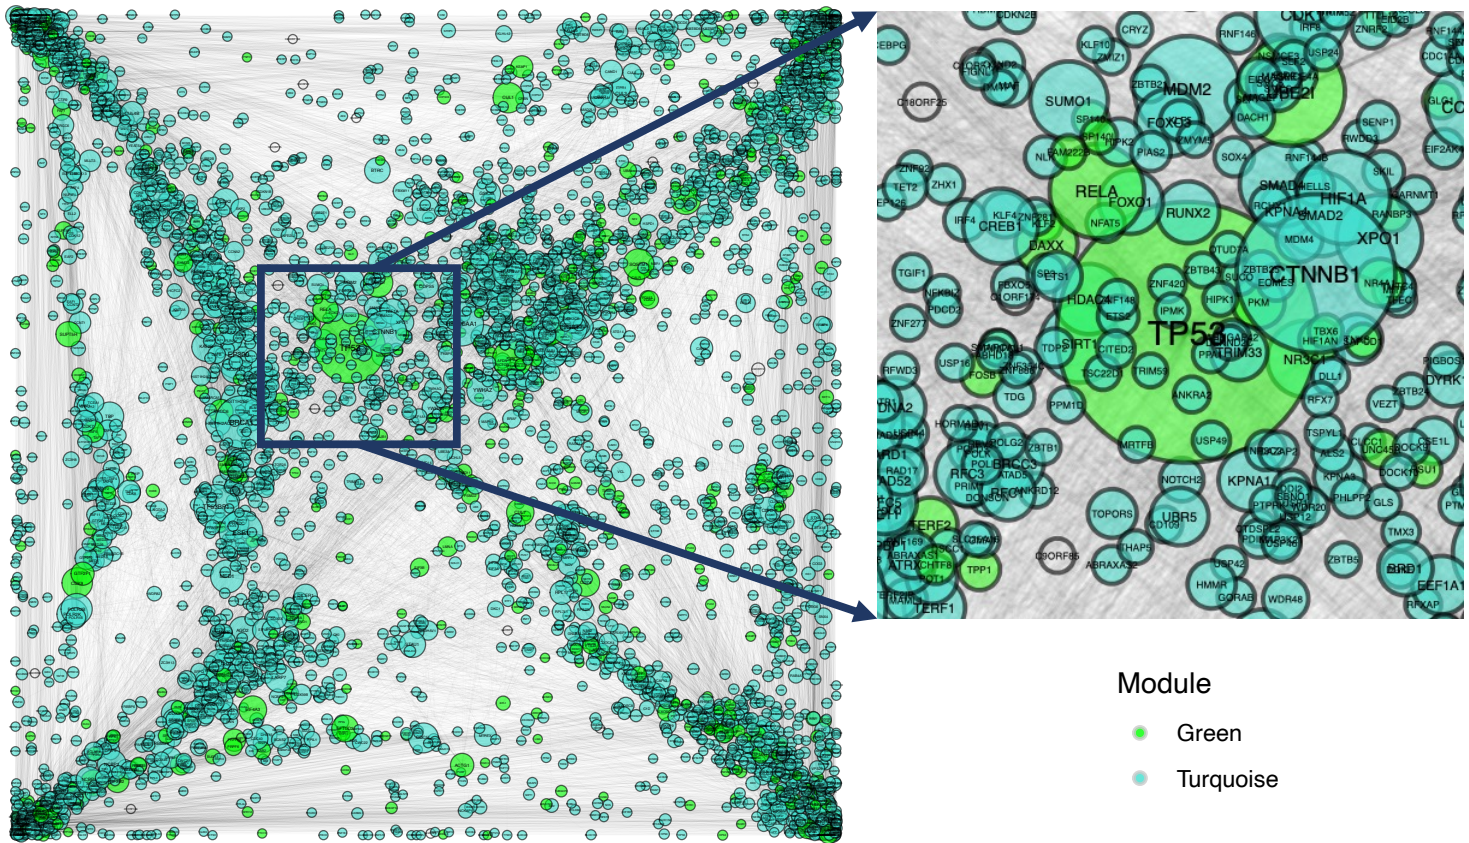

B

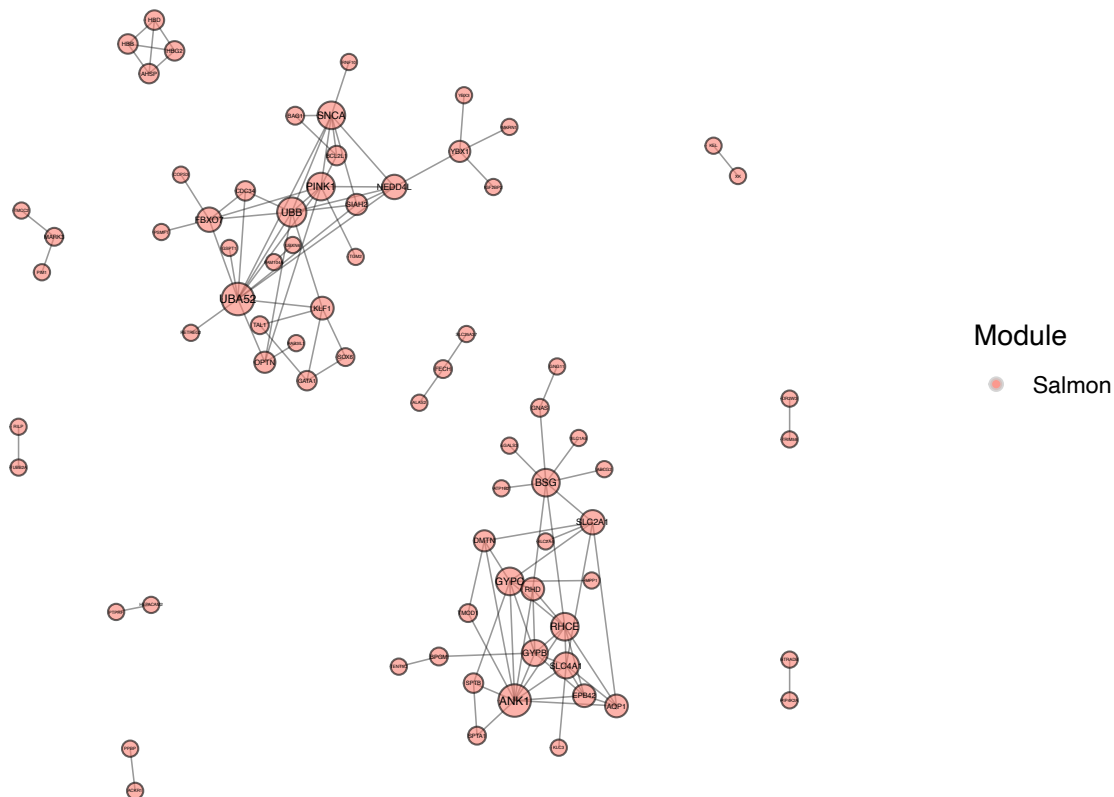

SFigure 6
